# Supplementary material
Source: PubMed Central journal article supplement (PMC4577884)
Supplement: JVI.01337-15_zjv999090821so1.pdf [file JVI.01337-15_zjv999090821so1.pdf]

## Supplementary Tables

**Table S1: Screen scores of agonist compounds.**

| <i>agonist</i> | <i>ID</i>   | <i>Type</i> | <i>MARV</i> | <i>AIV</i> | <i>Viability</i> |
|----------------|-------------|-------------|-------------|------------|------------------|
| 1              | Prestw-945  | agonist     | 0.060       | 0.125      | 0.737            |
| 2              | Prestw-101  | agonist     | 0.302       | 0.614      | 0.776            |
| 3              | Prestw-223  | agonist     | 0.475       | 0.834      | 0.880            |
| 4              | Prestw-295  | agonist     | 0.497       | 0.918      | 1.001            |
| 5              | Prestw-956  | agonist     | 0.534       | 0.808      | 0.739            |
| 6              | Prestw-1454 | agonist     | 0.559       | 0.880      | 0.995            |
| 7              | Prestw-908  | agonist     | 0.568       | 0.740      | 0.784            |
| 8              | Prestw-914  | agonist     | 0.633       | 0.884      | 0.954            |
| 9              | Prestw-1004 | agonist     | 0.655       | 1.460      | 1.025            |
| 10             | Prestw-1020 | agonist     | 0.667       | 0.976      | 0.515            |
| 11             | Prestw-1082 | agonist     | 0.673       | 1.053      | 0.912            |
| 12             | Prestw-96   | agonist     | 0.686       | 0.940      | 0.999            |
| 13             | Prestw-997  | agonist     | 0.800       | 1.334      | 0.591            |
| 14             | Prestw-1465 | agonist     | 0.842       | 0.893      | 1.018            |
| 15             | Prestw-1430 | agonist     | 0.850       | 0.681      | 0.969            |
| 16             | Prestw-1119 | agonist     | 0.861       | 1.213      | 0.774            |
| 17             | Prestw-1023 | agonist     | 0.884       | 0.953      | 0.969            |
| 18             | Prestw-598  | agonist     | 0.916       | 0.758      | 0.987            |
| 19             | Prestw-1018 | agonist     | 0.923       | 1.204      | 1.040            |
| 20             | Prestw-1088 | agonist     | 0.935       | 0.971      | 1.056            |
| 21             | Prestw-345  | agonist     | 0.954       | 1.001      | 1.050            |
| 22             | Prestw-1316 | agonist     | 0.954       | 1.287      | 0.974            |
| 23             | Prestw-927  | agonist     | 0.958       | 1.030      | 1.061            |
| 24             | Prestw-1017 | agonist     | 0.963       | 0.936      | 1.008            |
| 25             | Prestw-1352 | agonist     | 0.964       | 0.959      | 0.999            |
| 26             | Prestw-66   | agonist     | 0.965       | 1.131      | 0.999            |
| 27             | Prestw-588  | agonist     | 1.000       | 0.987      | 1.005            |
| 28             | Prestw-505  | agonist     | 1.012       | 0.991      | 1.093            |
| 29             | Prestw-1096 | agonist     | 1.020       | 0.906      | 0.988            |
| 30             | Prestw-1346 | agonist     | 1.021       | 1.066      | 1.048            |
| 31             | Prestw-1158 | agonist     | 1.028       | 1.079      | 1.118            |
| 32             | Prestw-617  | agonist     | 1.030       | 1.045      | 1.012            |
| 33             | Prestw-1392 | agonist     | 1.054       | 1.075      | 1.031            |
| 34             | Prestw-339  | agonist     | 1.057       | 1.183      | 0.969            |
| 35             | Prestw-1016 | agonist     | 1.060       | 0.997      | 1.030            |
| 36             | Prestw-535  | agonist     | 1.072       | 1.006      | 0.843            |
| 37             | Prestw-1041 | agonist     | 1.122       | 1.177      | 0.958            |
| 38             | Prestw-198  | agonist     | 1.146       | 1.068      | 0.905            |
| 39             | Prestw-282  | agonist     | 1.153       | 0.869      | 1.051            |

|    |             |         |       |       |       |
|----|-------------|---------|-------|-------|-------|
| 40 | Prestw-1091 | agonist | 1.158 | 1.006 | 0.996 |
| 41 | Prestw-197  | agonist | 1.161 | 0.968 | 1.105 |
| 42 | Prestw-1421 | agonist | 1.174 | 1.080 | 0.943 |
| 43 | Prestw-923  | agonist | 1.175 | 1.069 | 1.062 |
| 44 | Prestw-68   | agonist | 1.180 | 0.994 | 1.012 |
| 45 | Prestw-759  | agonist | 1.189 | 0.886 | 1.091 |
| 46 | Prestw-349  | agonist | 1.220 | 0.954 | 1.127 |
| 47 | Prestw-352  | agonist | 1.245 | 1.191 | 0.956 |
| 48 | Prestw-980  | agonist | 1.257 | 0.876 | 1.025 |
| 49 | Prestw-1511 | agonist | 1.307 | 1.090 | 0.977 |
| 50 | Prestw-391  | agonist | 1.345 | 1.077 | 1.021 |
| 51 | Prestw-1038 | agonist | 1.347 | 1.144 | 1.072 |
| 52 | Prestw-224  | agonist | 1.364 | 0.915 | 1.049 |
| 53 | Prestw-324  | agonist | 1.381 | 1.224 | 1.070 |
| 54 | Prestw-749  | agonist | 1.386 | 0.859 | 1.043 |
| 55 | Prestw-1292 | agonist | 1.399 | 1.216 | 1.036 |
| 56 | Prestw-880  | agonist | 1.421 | 1.130 | 1.119 |
| 57 | Prestw-1044 | agonist | 1.450 | 1.376 | 0.735 |
| 58 | Prestw-983  | agonist | 1.458 | 1.353 | 0.955 |
| 59 | Prestw-1283 | agonist | 1.462 | 1.231 | 0.980 |
| 60 | Prestw-949  | agonist | 1.482 | 0.971 | 1.059 |
| 61 | Prestw-926  | agonist | 1.489 | 1.489 | 0.875 |
| 62 | Prestw-1480 | agonist | 1.512 | 1.145 | 1.013 |
| 63 | Prestw-406  | agonist | 1.546 | 1.206 | 1.049 |
| 64 | Prestw-460  | agonist | 1.578 | 1.047 | 1.147 |
| 65 | Prestw-1073 | agonist | 1.591 | 1.192 | 1.019 |
| 66 | Prestw-85   | agonist | 1.598 | 0.825 | 0.959 |
| 67 | Prestw-726  | agonist | 1.598 | 0.965 | 1.088 |
| 68 | Prestw-361  | agonist | 1.605 | 1.026 | 0.994 |
| 69 | Prestw-481  | agonist | 1.807 | 1.238 | 1.052 |
| 70 | Prestw-968  | agonist | 1.815 | 1.238 | 0.961 |
| 71 | Prestw-248  | agonist | 1.856 | 0.995 | 1.214 |
| 72 | Prestw-539  | agonist | 1.968 | 1.338 | 0.976 |
| 73 | Prestw-739  | agonist | 2.349 | 0.980 | 1.051 |
| 74 | Prestw-911  | agonist | 3.332 | 1.222 | 1.028 |

---

**Table S2: Screen scores of antagonist compounds.**

| <i>antagonist</i> | <i>ID</i>   | <i>Type</i> | <i>MARV</i> | <i>AIV</i> | <i>Viability</i> |
|-------------------|-------------|-------------|-------------|------------|------------------|
| 1                 | Prestw-149  | antagonist  | 0.027       | 1.023      | 1.174            |
| 2                 | Prestw-509  | antagonist  | 0.198       | 1.086      | 1.029            |
| 3                 | Prestw-278  | antagonist  | 0.067       | 1.298      | 1.001            |
| 4                 | Prestw-99   | antagonist  | 0.197       | 1.112      | 0.987            |
| 5                 | Prestw-499  | antagonist  | 0.091       | 0.917      | 0.955            |
| 6                 | Prestw-115  | antagonist  | 0.059       | 1.350      | 0.904            |
| 7                 | Prestw-1456 | antagonist  | 0.066       | 1.298      | 0.885            |
| 8                 | Prestw-806  | antagonist  | 0.028       | 0.785      | 0.884            |
| 9                 | Prestw-559  | antagonist  | 0.039       | 1.147      | 0.874            |
| 10                | Prestw-141  | antagonist  | 0.176       | 1.027      | 0.871            |
| 11                | Prestw-297  | antagonist  | 0.087       | 0.717      | 0.867            |
| 12                | Prestw-263  | antagonist  | 0.179       | 1.260      | 0.864            |
| 13                | Prestw-350  | antagonist  | 0.099       | 0.989      | 0.853            |
| 14                | Prestw-340  | antagonist  | 0.197       | 1.675      | 0.849            |
| 15                | Prestw-888  | antagonist  | 0.055       | 0.819      | 0.826            |
| 16                | Prestw-103  | antagonist  | 0.024       | 0.996      | 0.812            |
| 17                | Prestw-706  | antagonist  | 0.019       | 1.149      | 0.807            |
| 18                | Prestw-1043 | antagonist  | 0.109       | 1.371      | 0.793            |
| 19                | Prestw-858  | antagonist  | 0.031       | 0.818      | 0.790            |
| 20                | Prestw-693  | antagonist  | 0.023       | 1.735      | 0.761            |
| 21                | Prestw-383  | antagonist  | 0.091       | 0.772      | 0.723            |
| 22                | Prestw-294  | antagonist  | 0.017       | 0.868      | 0.705            |
| 23                | Prestw-133  | antagonist  | 0.160       | 1.153      | 0.921            |
| 24                | Prestw-147  | agonist     | 0.027       | 1.124      | 1.021            |
| 25                | Prestw-64   | antagonist  | 0.013       | 0.136      | 1.061            |
| 26                | Prestw-842  | antagonist  | 0.017       | 0.687      | 0.852            |
| 27                | Prestw-932  | antagonist  | 0.024       | 0.389      | 0.847            |
| 28                | Prestw-793  | antagonist  | 0.060       | 0.412      | 0.817            |
| 29                | Prestw-74   | antagonist  | 0.046       | 0.600      | 0.756            |
| 30                | Prestw-288  | antagonist  | 0.144       | 0.657      | 0.670            |
| 31                | Prestw-399  | antagonist  | 0.029       | 0.806      | 0.668            |
| 32                | Prestw-348  | antagonist  | 0.020       | 1.034      | 0.624            |
| 33                | Prestw-312  | antagonist  | 0.052       | 1.333      | 0.611            |
| 34                | Prestw-306  | antagonist  | 0.010       | 0.441      | 0.585            |
| 35                | Prestw-576  | antagonist  | 0.095       | 0.983      | 0.565            |
| 36                | Prestw-146  | antagonist  | 0.013       | 0.715      | 0.528            |
| 37                | Prestw-998  | antagonist  | 0.013       | 0.501      | 0.524            |
| 38                | Prestw-308  | antagonist  | 0.025       | 0.860      | 0.513            |
| 39                | Prestw-1068 | antagonist  | 0.017       | 0.596      | 0.424            |
| 40                | Prestw-947  | antagonist  | 0.053       | 0.882      | 0.410            |

|    |             |            |       |       |       |
|----|-------------|------------|-------|-------|-------|
| 41 | Prestw-144  | antagonist | 0.010 | 0.395 | 0.395 |
| 42 | Prestw-375  | antagonist | 0.020 | 0.336 | 0.387 |
| 43 | Prestw-1368 | antagonist | 0.014 | 1.237 | 0.385 |
| 44 | Prestw-320  | antagonist | 0.027 | 0.325 | 0.354 |
| 45 | Prestw-283  | antagonist | 0.024 | 1.147 | 0.347 |
| 46 | Prestw-1341 | antagonist | 0.013 | 0.047 | 0.259 |
| 47 | Prestw-37   | antagonist | 0.097 | 0.354 | 0.202 |
| 48 | Prestw-269  | antagonist | 0.027 | 0.894 | 0.199 |
| 49 | Prestw-125  | antagonist | 0.021 | 0.506 | 0.196 |
| 50 | Prestw-53   | antagonist | 0.013 | 0.650 | 0.154 |
| 51 | Prestw-313  | antagonist | 0.021 | 0.641 | 0.119 |
| 52 | Prestw-78   | antagonist | 0.029 | 0.329 | 0.082 |
| 53 | Prestw-136  | antagonist | 0.020 | 0.386 | 0.043 |
| 54 | Prestw-138  | antagonist | 0.015 | 0.024 | 0.024 |
| 55 | Prestw-430  | antagonist | 0.202 | 0.873 | 0.900 |
| 56 | Prestw-455  | antagonist | 0.204 | 0.926 | 0.975 |
| 57 | Prestw-132  | antagonist | 0.239 | 0.990 | 0.887 |
| 58 | Prestw-844  | antagonist | 0.256 | 1.030 | 0.951 |
| 59 | Prestw-1074 | antagonist | 0.290 | 0.543 | 0.839 |
| 60 | Prestw-105  | antagonist | 0.309 | 0.466 | 0.644 |
| 61 | Prestw-1152 | antagonist | 0.313 | 0.900 | 0.659 |
| 62 | Prestw-34   | antagonist | 0.325 | 1.020 | 0.145 |
| 63 | Prestw-377  | antagonist | 0.330 | 0.785 | 0.985 |
| 64 | Prestw-529  | antagonist | 0.343 | 0.947 | 0.962 |
| 65 | Prestw-1075 | antagonist | 0.392 | 0.853 | 0.965 |
| 66 | Prestw-47   | antagonist | 0.405 | 0.434 | 0.925 |
| 67 | Prestw-707  | antagonist | 0.414 | 0.859 | 0.968 |
| 68 | Prestw-128  | antagonist | 0.415 | 0.474 | 0.922 |
| 69 | Prestw-531  | antagonist | 0.426 | 1.030 | 0.955 |
| 70 | Prestw-457  | antagonist | 0.464 | 2.049 | 1.015 |
| 71 | Prestw-1258 | antagonist | 0.468 | 1.023 | 0.996 |
| 72 | Prestw-371  | antagonist | 0.486 | 1.188 | 0.970 |
| 73 | Prestw-1055 | antagonist | 0.511 | 1.230 | 0.947 |
| 74 | Prestw-1029 | antagonist | 0.549 | 1.102 | 0.905 |
| 75 | Prestw-1188 | antagonist | 0.588 | 1.388 | 0.900 |
| 76 | Prestw-1432 | antagonist | 0.591 | 1.358 | 0.585 |
| 77 | Prestw-944  | antagonist | 0.604 | 0.932 | 0.786 |
| 78 | Prestw-227  | antagonist | 0.608 | 1.201 | 0.958 |
| 79 | Prestw-1424 | antagonist | 0.630 | 0.750 | 0.707 |
| 80 | Prestw-169  | antagonist | 0.634 | 1.181 | 1.110 |
| 81 | Prestw-277  | antagonist | 0.640 | 1.045 | 1.001 |
| 82 | Prestw-807  | antagonist | 0.643 | 0.960 | 0.920 |
| 83 | Prestw-931  | antagonist | 0.645 | 0.871 | 1.005 |

|     |             |            |       |       |       |
|-----|-------------|------------|-------|-------|-------|
| 84  | Prestw-311  | antagonist | 0.677 | 0.859 | 0.833 |
| 85  | Prestw-1058 | antagonist | 0.686 | 1.034 | 1.020 |
| 86  | Prestw-461  | antagonist | 0.689 | 0.901 | 0.756 |
| 87  | Prestw-704  | antagonist | 0.698 | 0.948 | 1.032 |
| 88  | Prestw-1117 | antagonist | 0.710 | 1.226 | 0.973 |
| 89  | Prestw-392  | antagonist | 0.713 | 0.864 | 0.972 |
| 90  | Prestw-1433 | antagonist | 0.713 | 0.971 | 1.071 |
| 91  | Prestw-1012 | antagonist | 0.716 | 0.819 | 1.000 |
| 92  | Prestw-1323 | antagonist | 0.725 | 1.244 | 0.926 |
| 93  | Prestw-1325 | antagonist | 0.734 | 0.493 | 1.065 |
| 94  | Prestw-180  | antagonist | 0.745 | 0.946 | 0.913 |
| 95  | Prestw-1066 | antagonist | 0.749 | 1.011 | 0.949 |
| 96  | Prestw-928  | antagonist | 0.758 | 0.830 | 0.873 |
| 97  | Prestw-110  | antagonist | 0.775 | 0.854 | 1.055 |
| 98  | Prestw-922  | antagonist | 0.778 | 0.830 | 0.998 |
| 99  | Prestw-584  | antagonist | 0.801 | 1.147 | 1.089 |
| 100 | Prestw-1490 | antagonist | 0.808 | 0.848 | 1.028 |
| 101 | Prestw-1187 | antagonist | 0.821 | 0.962 | 0.997 |
| 102 | Prestw-1497 | antagonist | 0.824 | 1.049 | 0.993 |
| 103 | Prestw-785  | antagonist | 0.834 | 0.721 | 0.773 |
| 104 | Prestw-213  | antagonist | 0.836 | 1.082 | 1.029 |
| 105 | Prestw-751  | antagonist | 0.844 | 1.239 | 1.058 |
| 106 | Prestw-510  | antagonist | 0.871 | 1.360 | 1.076 |
| 107 | Prestw-119  | antagonist | 0.878 | 1.006 | 1.134 |
| 108 | Prestw-1144 | antagonist | 0.886 | 1.189 | 1.024 |
| 109 | Prestw-921  | antagonist | 0.889 | 1.013 | 1.008 |
| 110 | Prestw-1307 | antagonist | 0.889 | 0.973 | 1.010 |
| 111 | Prestw-209  | antagonist | 0.918 | 0.800 | 1.066 |
| 112 | Prestw-65   | antagonist | 0.920 | 1.376 | 0.881 |
| 113 | Prestw-915  | antagonist | 0.921 | 1.044 | 1.033 |
| 114 | Prestw-1199 | antagonist | 0.931 | 0.788 | 1.023 |
| 115 | Prestw-1256 | antagonist | 0.936 | 1.320 | 0.981 |
| 116 | Prestw-117  | antagonist | 0.937 | 1.169 | 0.976 |
| 117 | Prestw-935  | antagonist | 0.938 | 1.044 | 0.901 |
| 118 | Prestw-847  | antagonist | 0.949 | 1.100 | 1.040 |
| 119 | Prestw-1510 | antagonist | 0.954 | 0.939 | 0.956 |
| 120 | Prestw-484  | antagonist | 0.959 | 1.318 | 0.918 |
| 121 | Prestw-258  | antagonist | 0.963 | 0.807 | 1.109 |
| 122 | Prestw-1022 | antagonist | 0.968 | 0.965 | 0.961 |
| 123 | Prestw-1189 | antagonist | 0.977 | 1.019 | 0.960 |
| 124 | Prestw-208  | antagonist | 0.982 | 1.156 | 1.042 |
| 125 | Prestw-59   | antagonist | 0.987 | 1.148 | 1.099 |
| 126 | Prestw-1350 | antagonist | 0.993 | 0.936 | 0.800 |

|     |             |            |       |       |       |
|-----|-------------|------------|-------|-------|-------|
| 127 | Prestw-443  | antagonist | 0.999 | 1.067 | 1.004 |
| 128 | Prestw-683  | antagonist | 1.002 | 1.064 | 1.021 |
| 129 | Prestw-116  | antagonist | 1.003 | 1.192 | 1.008 |
| 130 | Prestw-874  | antagonist | 1.007 | 1.138 | 1.014 |
| 131 | Prestw-109  | antagonist | 1.009 | 1.048 | 1.090 |
| 132 | Prestw-216  | antagonist | 1.016 | 1.116 | 0.976 |
| 133 | Prestw-1364 | antagonist | 1.031 | 0.979 | 0.991 |
| 134 | Prestw-857  | antagonist | 1.032 | 1.106 | 1.024 |
| 135 | Prestw-228  | antagonist | 1.039 | 1.045 | 1.077 |
| 136 | Prestw-56   | antagonist | 1.057 | 0.710 | 1.118 |
| 137 | Prestw-129  | antagonist | 1.059 | 1.038 | 1.057 |
| 138 | Prestw-1102 | antagonist | 1.067 | 1.063 | 1.044 |
| 139 | Prestw-42   | antagonist | 1.077 | 1.134 | 1.060 |
| 140 | Prestw-262  | antagonist | 1.093 | 0.955 | 0.914 |
| 141 | Prestw-289  | antagonist | 1.114 | 0.769 | 1.037 |
| 142 | Prestw-62   | antagonist | 1.117 | 1.258 | 1.048 |
| 143 | Prestw-981  | antagonist | 1.123 | 0.801 | 1.077 |
| 144 | Prestw-52   | antagonist | 1.131 | 0.919 | 0.984 |
| 145 | Prestw-1095 | antagonist | 1.136 | 0.921 | 1.055 |
| 146 | Prestw-75   | antagonist | 1.136 | 0.974 | 1.038 |
| 147 | Prestw-475  | antagonist | 1.137 | 1.166 | 0.980 |
| 148 | Prestw-104  | antagonist | 1.139 | 1.124 | 1.011 |
| 149 | Prestw-877  | antagonist | 1.151 | 1.133 | 1.081 |
| 150 | Prestw-157  | antagonist | 1.161 | 1.020 | 1.063 |
| 151 | Prestw-93   | antagonist | 1.161 | 1.260 | 0.947 |
| 152 | Prestw-1190 | antagonist | 1.166 | 1.007 | 1.061 |
| 153 | Prestw-69   | antagonist | 1.174 | 1.015 | 1.081 |
| 154 | Prestw-201  | antagonist | 1.178 | 1.273 | 1.049 |
| 155 | Prestw-1036 | antagonist | 1.185 | 1.166 | 1.028 |
| 156 | Prestw-337  | antagonist | 1.191 | 0.939 | 1.054 |
| 157 | Prestw-948  | antagonist | 1.191 | 1.064 | 1.102 |
| 158 | Prestw-35   | antagonist | 1.200 | 0.909 | 1.034 |
| 159 | Prestw-503  | antagonist | 1.209 | 1.080 | 1.032 |
| 160 | Prestw-303  | antagonist | 1.213 | 1.000 | 1.023 |
| 161 | Prestw-360  | antagonist | 1.219 | 1.121 | 0.968 |
| 162 | Prestw-382  | antagonist | 1.219 | 1.123 | 1.029 |
| 163 | Prestw-820  | antagonist | 1.222 | 0.830 | 1.007 |
| 164 | Prestw-827  | antagonist | 1.235 | 0.895 | 1.003 |
| 165 | Prestw-27   | antagonist | 1.250 | 1.108 | 1.073 |
| 166 | Prestw-250  | antagonist | 1.257 | 0.995 | 1.079 |
| 167 | Prestw-1507 | antagonist | 1.267 | 0.969 | 1.073 |
| 168 | Prestw-111  | antagonist | 1.274 | 1.017 | 1.012 |
| 169 | Prestw-342  | antagonist | 1.274 | 0.895 | 1.070 |

|     |             |            |       |       |       |
|-----|-------------|------------|-------|-------|-------|
| 170 | Prestw-1111 | antagonist | 1.284 | 0.916 | 1.076 |
| 171 | Prestw-1057 | antagonist | 1.298 | 1.053 | 0.975 |
| 172 | Prestw-900  | antagonist | 1.305 | 0.898 | 1.091 |
| 173 | Prestw-971  | antagonist | 1.306 | 0.973 | 1.008 |
| 174 | Prestw-150  | antagonist | 1.313 | 1.275 | 1.135 |
| 175 | Prestw-1034 | antagonist | 1.316 | 1.207 | 1.046 |
| 176 | Prestw-1317 | antagonist | 1.323 | 1.230 | 1.094 |
| 177 | Prestw-801  | antagonist | 1.328 | 1.044 | 0.998 |
| 178 | Prestw-974  | antagonist | 1.366 | 1.152 | 0.953 |
| 179 | Prestw-653  | antagonist | 1.427 | 0.966 | 0.976 |
| 180 | Prestw-162  | antagonist | 1.429 | 1.144 | 1.002 |
| 181 | Prestw-565  | antagonist | 1.452 | 1.091 | 1.082 |
| 182 | Prestw-334  | antagonist | 1.461 | 1.016 | 1.135 |
| 183 | Prestw-310  | antagonist | 1.471 | 0.919 | 1.156 |
| 184 | Prestw-1035 | antagonist | 1.498 | 0.993 | 1.038 |
| 185 | Prestw-760  | antagonist | 1.503 | 0.962 | 1.080 |
| 186 | Prestw-1259 | antagonist | 1.527 | 0.758 | 0.933 |
| 187 | Prestw-332  | antagonist | 1.533 | 1.051 | 1.015 |
| 188 | Prestw-953  | antagonist | 1.555 | 1.021 | 1.017 |
| 189 | Prestw-90   | antagonist | 1.594 | 0.971 | 1.060 |
| 190 | Prestw-818  | antagonist | 1.611 | 1.078 | 1.054 |
| 191 | Prestw-322  | antagonist | 1.639 | 1.254 | 0.998 |
| 192 | Prestw-1039 | antagonist | 1.691 | 1.163 | 1.030 |
| 193 | Prestw-330  | antagonist | 1.696 | 1.089 | 1.098 |
| 194 | Prestw-733  | antagonist | 1.781 | 1.011 | 0.998 |
| 195 | Prestw-966  | antagonist | 1.801 | 1.304 | 0.930 |
| 196 | Prestw-80   | antagonist | 1.809 | 1.284 | 1.109 |
| 197 | Prestw-882  | antagonist | 1.832 | 1.130 | 1.032 |
| 198 | Prestw-167  | antagonist | 1.834 | 1.163 | 0.670 |
| 199 | Prestw-230  | antagonist | 1.845 | 1.022 | 1.109 |

---

**Table S3: Screen scores of compounds which have both agonist and antagonist activity.**

| <i>Both</i> | <i>ID</i>  | <i>Type</i> | <i>MARV</i> | <i>AIV</i> | <i>Viability</i> |
|-------------|------------|-------------|-------------|------------|------------------|
| 1           | Prestw-364 | both        | 0.029       | 1.267      | 0.599            |
| 2           | Prestw-299 | both        | 0.187       | 0.323      | 0.544            |
| 3           | Prestw-975 | both        | 0.366       | 1.194      | 0.875            |
| 4           | Prestw-905 | both        | 0.906       | 0.995      | 1.056            |
| 5           | Prestw-26  | both        | 0.966       | 1.039      | 1.023            |
| 6           | Prestw-60  | both        | 1.063       | 0.969      | 0.924            |
| 7           | Prestw-374 | both        | 1.190       | 0.946      | 1.025            |
| 8           | Prestw-978 | both        | 1.283       | 1.252      | 0.990            |
| 9           | Prestw-543 | both        | 1.566       | 1.220      | 1.084            |

**Table S4: Summary of infectious filovirus assay data of six lead compounds.**

| <b>Drug name</b>             | <b>Infectious virus IC<sub>50</sub> (µM)</b> |             | <b>CC<sub>50</sub> (µM)</b> | <b>Selectivity index</b> |             |
|------------------------------|----------------------------------------------|-------------|-----------------------------|--------------------------|-------------|
|                              | <b>EBOV</b>                                  | <b>MARV</b> |                             | <b>EBOV</b>              | <b>MARV</b> |
| Benztropine mesylate         | 3.7                                          | 13.2        | 68                          | 18.4                     | 5.2         |
| Cyproheptadine hydrochloride | 7.8                                          | 10.2        | 111                         | 14.2                     | 10.9        |
| Dilazep dihydrochloride      | 10                                           | 21.7        | 48                          | 4.8                      | 2.2         |
| Propafenone hydrochloride    | 13.6                                         | 23.7        | 51                          | 3.8                      | 2.2         |
| Trimipramine maleate         | 11.1                                         | 10.9        | 73                          | 6.6                      | 6.7         |
| Promethazine hydrochloride   | 19.4                                         | 19.1        | 37                          | 1.9                      | 1.9         |
